# Supplementary material
Source: PubMed Central journal article supplement (PMC7664160)
Supplement: NIHMS1644664-supplement-Supplementary_figures_and_tables.pdf [file NIHMS1644664-supplement-Supplementary_figures_and_tables.pdf]

Benzothiourea derivatives target the secretory pathway of the human fungal pathogen *Cryptococcus neoformans*

Sarah R. Beattie<sup>1</sup>, Nicholas Schnicker<sup>2</sup>, Thomas Murante<sup>3</sup>, Kavitha Kettimuthu<sup>4</sup>, Noelle S. Williams<sup>4</sup>, Lokesh Gakhar<sup>2,5</sup>, Damian J. Krysan<sup>1,6\*</sup>

<sup>1</sup> Department of Pediatrics, Carver College of Medicine, University of Iowa, 25 South Grand Avenue, Iowa City, Iowa 52245

<sup>2</sup> Protein & Crystallography Facility, Carver College of Medicine, University of Iowa, 51 Newton Road, Iowa City, Iowa 52245

<sup>3</sup> Department of Pediatrics, University of Rochester, 601 Elmwood Avenue, Rochester, New York 14642

<sup>4</sup> Department of Biochemistry, University of Texas Southwestern, 5323 Harry Hines Blvd. Dallas, Texas 75390

<sup>5</sup> Department of Biochemistry, Carver College of Medicine, University of Iowa, 51 Newton Road, Iowa City, Iowa 52245

<sup>6</sup> Department of Microbiology and Immunology, Carver College of Medicine, University of Iowa, 25 South Grand Avenue, Iowa City, IA

4 Pages: Supplementary Table 1 and Supplementary Figures 1-3

| Clinical antifungal | 1                           |                             | Clinical antifungal         |                             | FICI |
|---------------------|-----------------------------|-----------------------------|-----------------------------|-----------------------------|------|
|                     | MIC <sub>a</sub><br>(µg/mL) | MIC <sub>b</sub><br>(µg/mL) | MIC <sub>a</sub><br>(µg/mL) | MIC <sub>b</sub><br>(µg/mL) |      |
| Amphotericin B      | 2                           | 2                           | 2                           | 2                           | 2    |
| Fluconazole         | 4                           | 2                           | 2                           | 1                           | 1    |
| 5-Flucytosine       | 2                           | 2                           | 2                           | 2                           | 2    |

**Table S1. Fractional inhibitory concentration indices (FICI) of 1 with clinical antifungals.** FICI determined using standard checkerboard susceptibility assays under CLSI conditions. FICI = 1 – 4 is considered no interaction. MIC<sub>a</sub> = MIC of single drug, MIC<sub>b</sub> = MIC of drug in combination. Representative data from two independent experiments.

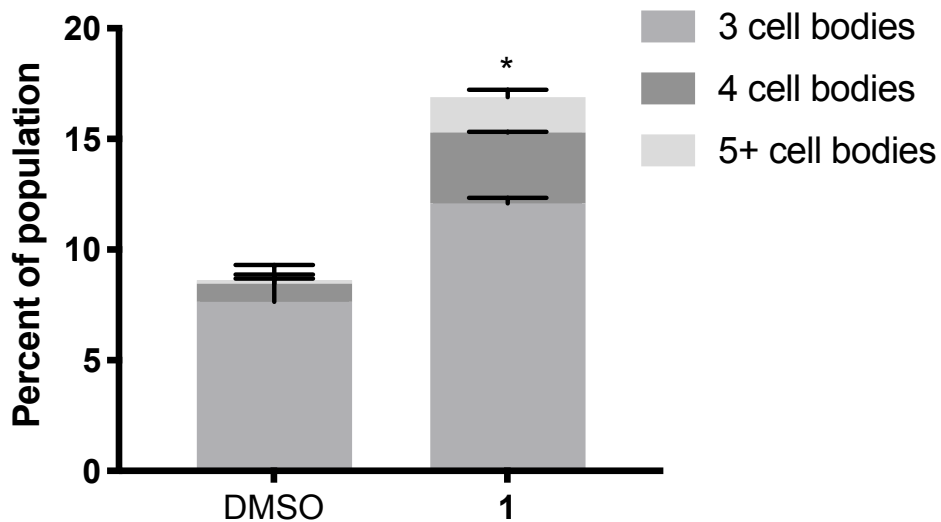

**Figure S1. BTU treatment induces a cell separation defect.** Cells grown in 10% Sab pH8 with **1** (1  $\mu\text{g}/\text{mL}$ ) have a two fold higher incidence of cells with 3 cell bodies or more. \* $p=0.0099$  by unpaired t-test of total 3+ cell bodies compared to control. Data represent mean and SD of triplicates with at least 150 cells counted per sample.

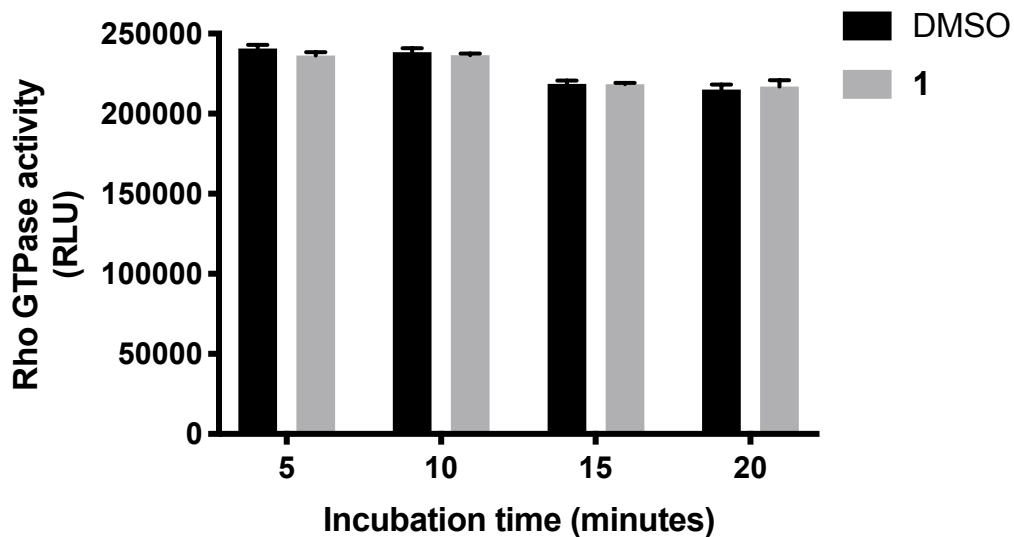

**Figure S2. BTU derivatives do not affect Rho1 GTP hydrolysis.** Incubation with **1** (25  $\mu\text{g}/\text{mL}$ ) did not affect the intrinsic GTP hydrolysis of *Cn*Rho1 as measured by GTPase-Glo assay. Data represent mean and SD of triplicates.

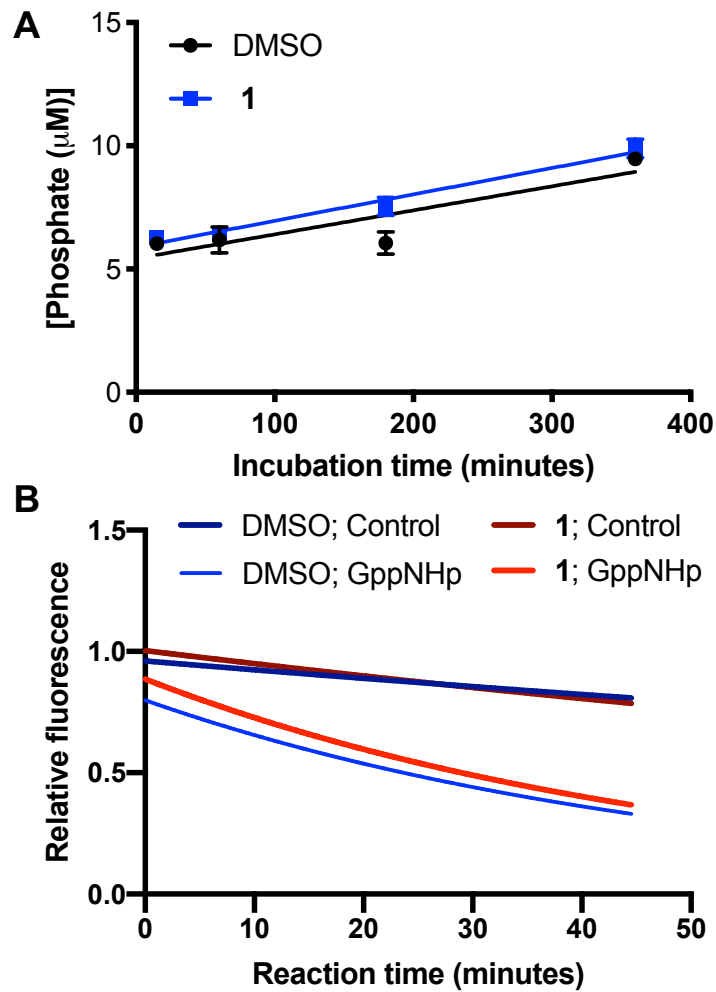

**Figure S3. Intrinsic GTPase activity or GDP/GTP exchange is not affected by BTU derivatives.** A) Purified Sav1 binds the fluorescently labeled mantGDP. Upon addition of GppNHp (5  $\mu\text{M}$ ), GDP is exchanged, as measured by decrease in fluorescence compared to control. Data shows non linear fit of a single reaction representative of duplicates from one of three independent experiments. B) *CnSav1* GTPase activity is not affected by **1** (50  $\mu\text{g}/\text{mL}$ ) as measured by Malachite green phosphate detection. Data represent mean and SD of duplicates. Lines are linear regression of each data set.
